# Supplementary material for: Matrine treatment reduces retinal ganglion cell apoptosis in experimental optic neuritis
Source: PubMed Central journal article supplement (PMC8097076; doi:10.1038/s41598-021-89086-7), 2021-05-04

# **Supplementary Information**

## **Matrine treatment reduces retinal ganglion cells apoptosis in experimental optic neuritis**

Jian Kang<sup>1,+</sup>, Shuqing Liu<sup>1,+</sup>, Yifan Song<sup>2</sup>, Yaojuan Chu<sup>1</sup>, Mengru Wang<sup>1</sup>,

Yamin Shi<sup>3</sup>, Fengyan Zhang<sup>4,\*</sup> & Lin Zhu<sup>1,\*</sup>

<sup>1</sup> Department of Pharmacy, The First Affiliated Hospital of Zhengzhou

University, Zhengzhou, Henan, China

<sup>2</sup> Department of Ophthalmology, Peking University Third Hospital, Beijing Key

Laboratory for Restoration of Injured Ocular Nerve, Peking University Third

Hospital, Beijing, China

<sup>3</sup> Department of Chinese Medicine, The First Affiliated Hospital of Zhengzhou

University, Zhengzhou, Henan, China

<sup>4</sup> Department of Ophthalmology, The First Affiliated Hospital of Zhengzhou

University, Zhengzhou, Henan, China

\* corresponding author: Lin Zhu, zhulin66zhulin@163.com

+ these authors contributed equally to this work

## Supplementary Figures

The original Western blot images

Figure 7 Bax

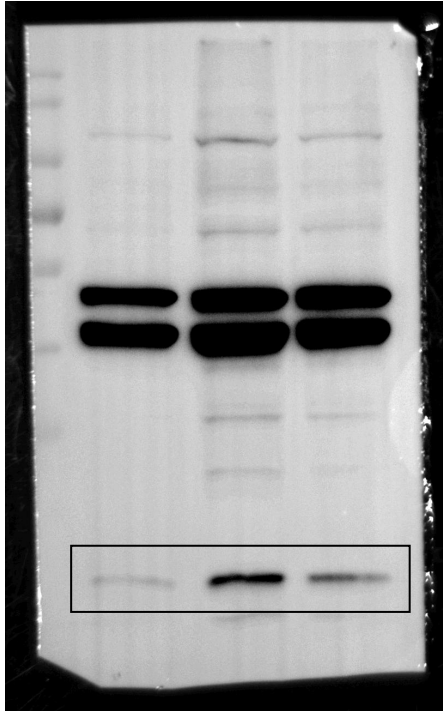

Figure 7 Bcl-2

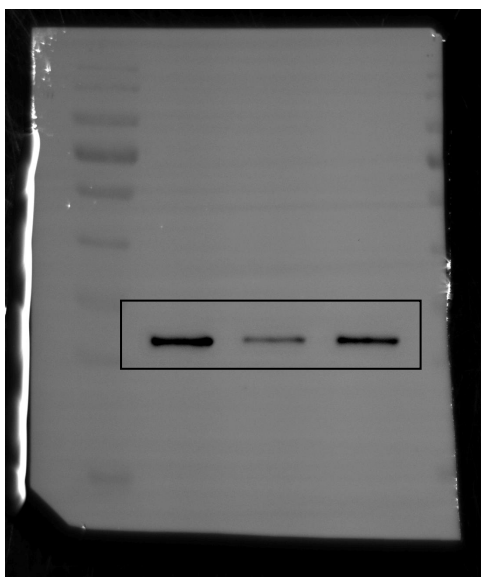

**Figure 7 p-Akt**

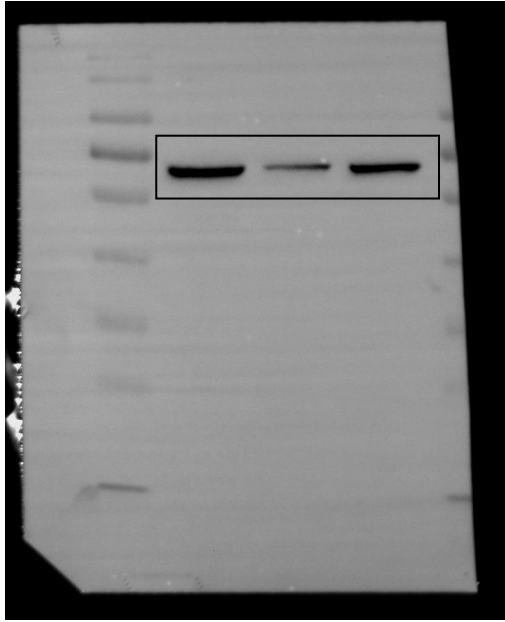

**Figure 7 Akt**

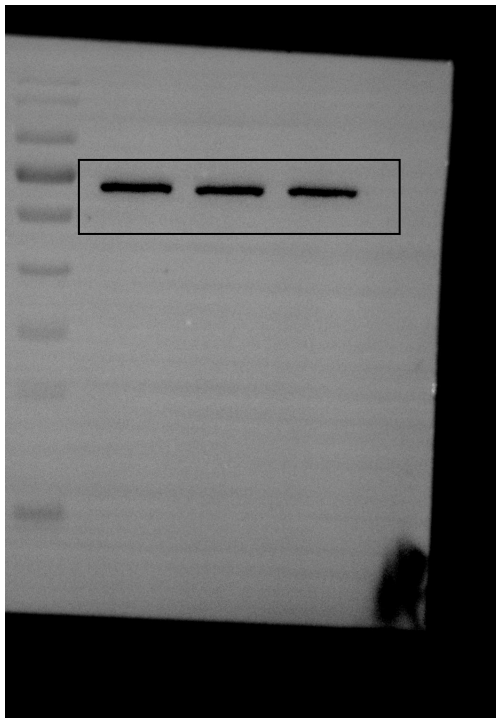

Figure 7  $\beta$ -actin

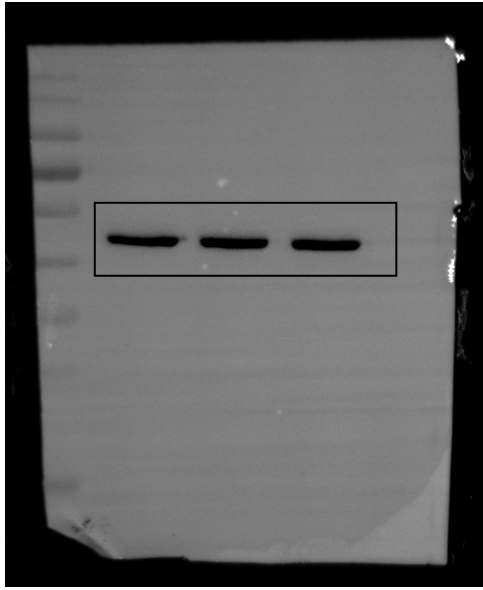

Supplement: 41598_2021_89086_MOESM1_ESM.pdf [file 41598_2021_89086_MOESM1_ESM.pdf]
